1 ***Staphylococcus aureus* overcomes anaerobe-derived short-chain fatty acid stress via FadX and**  
2 **the CodY regulon**

3  
4 Joshua R. Fletcher<sup>1</sup>, Alex R. Villareal<sup>1</sup>, Mitchell Penningroth<sup>1</sup>, Ryan C. Hunter<sup>1\*</sup>

5  
6 <sup>1</sup>Department of Microbiology & Immunology, University of Minnesota, 689 23rd Avenue SE,  
7 Minneapolis, MN 55455

8  
9 \* To whom correspondence should be addressed:

10  
11 Ryan C. Hunter  
12 Department of Microbiology & Immunology  
13 University of Minnesota  
14 689 23rd Ave. SE  
15 Minneapolis, MN 55455  
16 Tel: (612) 625-1402  
17 Email: [rchunter@umn.edu](mailto:rchunter@umn.edu)

18  
19  
20 Running Title: Mechanisms of *S. aureus* short-chain fatty acid stresses

21 **Abstract**

22  
23 Chronic rhinosinusitis (CRS) is characterized by immune dysfunction, mucus hypersecretion, and  
24 persistent infection of the paranasal sinuses. While *Staphylococcus aureus* is a primary CRS pathogen,  
25 recent sequence-based surveys have found increased relative abundances of anaerobic bacteria,  
26 suggesting that *S. aureus* may experience altered metabolic landscapes in CRS relative to healthy  
27 airways. To test this possibility, we characterized the growth kinetics and transcriptome of *S. aureus* in  
28 supernatants of the abundant CRS anaerobe *Fusobacterium nucleatum*. While growth was initially  
29 delayed, *S. aureus* ultimately grew to similar levels as in the control medium. The transcriptome was  
30 significantly affected by *F. nucleatum* metabolites, with the *agr* quorum sensing system notably  
31 repressed. Conversely, expression of *fadX*, encoding a putative propionate coA-transferase, was  
32 significantly increased, leading to our hypothesis that short chain fatty acids (SCFAs) produced by *F.*  
33 *nucleatum* could mediate *S. aureus* growth behavior and gene expression. Supplementation with  
34 propionate and butyrate, but not acetate, recapitulated delayed growth phenotypes observed in *F.*  
35 *nucleatum* supernatants. A *fadX* mutant was found to be more sensitive than wild type to propionate,  
36 suggesting a role for FadX in the *S. aureus* SCFA stress response. Interestingly, spontaneous resistance  
37 to butyrate, but not propionate, was frequently observed. Whole genome sequencing and targeted  
38 mutagenesis identified *codY* mutants as resistant to butyrate inhibition. Together, these data show that *S.*  
39 *aureus* physiology is dependent on its co-colonizing microbiota and metabolites they exchange, and  
40 indicate that propionate and butyrate may act on different targets in *S. aureus* to suppress its growth.

41 **Importance**

42 *S. aureus* is an important CRS pathogen, yet is found in the upper airways of 30-50% of people without  
43 complications. The presence of strict and facultative anaerobic bacteria in CRS sinuses has recently  
44 spurred research into bacterial interactions and how they influence *S. aureus* physiology and  
45 pathogenesis. We show here that propionate and butyrate produced by one such CRS anaerobe, *F.*  
46 *nucleatum*, alter the growth and gene expression of *S. aureus*. We show that *fadX* is important for *S.*  
47 *aureus* to resist propionate stress, and that the CodY regulon mediates growth in inhibitory concentrations  
48 of butyrate. This work highlights the possible complexity of *S. aureus*-anaerobe interactions, and  
49 implicates membrane stress as a possible mechanism influencing *S. aureus* behavior in CRS sinuses.

## 50 INTRODUCTION

51 Chronic rhinosinusitis (CRS) is an inflammatory condition of the sinuses that is broadly  
52 characterized by facial pain, mucus hypersecretion and accumulation, immune dysfunction, pathogen  
53 colonization, and persistent polymicrobial infection<sup>1-6</sup>. Although CRS affects up to 15% of the population  
54 and represents a substantial economic burden, its complexity has slowed development of new treatments  
55 and therapeutic strategies<sup>7</sup>. CRS patients are frequently prescribed antibiotics, yet many do not respond  
56 and require functional endoscopic sinus surgery (FESS) to remove accumulated mucus and inflamed  
57 mucosa that prevents proper sinus drainage<sup>5</sup>. Given the urgent threat of antimicrobial resistance among  
58 CRS microbiota, there is a critical need to better understand microbial community dynamics in the upper  
59 airways and how they may contribute to disease<sup>8</sup>.

60 *Staphylococcus aureus* is a frequently isolated CRS pathogen and is aggressively targeted by  
61 antibiotic therapy, yet, this bacterium is also prevalent and abundant in the upper airways of  
62 asymptomatic healthy individuals<sup>9,10</sup>. This seeming paradox suggests that colonization by *S. aureus* is  
63 not sufficient to drive disease, but rather that there may be important environmental cues in the upper  
64 airways that shift the lifestyle of *S. aureus* towards commensalism or pathogenesis. Indeed, in a genome-  
65 wide association study of *S. aureus* isolated from 28 CRS patients, few *S. aureus* genetic signatures  
66 were associated with CRS subtypes, suggesting that *S. aureus* pathogenesis in CRS is unlikely due to  
67 selection for increased production of a particular toxin<sup>11</sup>.

68 Application of culture-independent genomics to the study of CRS has led to a paradigm shift from  
69 a small number of etiologic bacterial species toward a polymicrobial basis of disease<sup>4,5,12</sup>. However, the  
70 role of the greater CRS microbiome in disease pathophysiology remains poorly understood. To address  
71 this knowledge gap, we recently surveyed 16S rRNA gene sequences in FESS-derived mucus from a  
72 cohort of CRS patients and found increased relative abundances of numerous anaerobic bacterial taxa,  
73 including many known to degrade mucin glycoproteins<sup>6</sup>. CRS bacterial communities enriched on mucins  
74 as a sole carbon source converged on similar profiles, typically dominated by a combination of  
75 *Streptococcus*, *Prevotella*, *Fusobacterium*, and *Veillonella*. Interestingly, *S. aureus* had a variety of  
76 growth phenotypes and gene expression patterns when cultured in supernatants from these enrichment

77 communities, indicating that nutrient usage and metabolite release by co-colonizing microbiota can  
78 profoundly affect *S. aureus* physiology<sup>6</sup>. Enrichment supernatants that best supported *S. aureus* growth  
79 had low levels of short-chain fatty acids (acetate, propionate, butyrate; SCFAs) and undetectable levels  
80 of *Fusobacterium*, members of which are known for producing SCFAs as amino acid fermentation  
81 byproducts<sup>13,14</sup>. However, neither growth promotion nor inhibition could be ascribed to any one taxon or  
82 metabolite within these communities.

83 In this study, we extend our previous work by demonstrating that *F. nucleatum* metabolites  
84 impede *S. aureus* growth and repress transcription of the accessory gene regulator (*agr*) quorum sensing  
85 system while inducing a putative fatty acid degradation operon (*fadXEDBA*). We confirm that the SCFAs  
86 propionate and butyrate are sufficient to impair *S. aureus* growth and alter gene expression, while acetate  
87 had relatively little effect. We show that growth of a  $\Delta fadX$  mutant is significantly attenuated in the  
88 presence of propionate only, despite differing from butyrate by only one carbon. Spontaneous resistance  
89 to growth inhibition by butyrate arose frequently, while we failed to obtain propionate resistant mutants.  
90 Genome sequencing of butyrate resistant mutants identified premature stop codons and in-frame  
91 deletions in the gene encoding the nutrient-responsive global regulator *codY*, indicating a connection  
92 between de-repression of the CodY regulon through nutrient limitation and SCFA resistance. These data  
93 suggest that certain anaerobes may influence CRS community structure by limiting *S. aureus* growth via  
94 propionate and butyrate production. In addition, they implicate the CodY regulon as a mechanism  
95 allowing *S. aureus* persistence in otherwise inhospitable anaerobic bacterial communities of the upper  
96 airways.

97

## 98 **MATERIALS AND METHODS**

99 **Bacterial strains and growth conditions.** Bacterial strains used throughout this study are shown in  
100 Table S1. Plasmids and primers used for mutagenesis and complementation can be found in Table S2  
101 and S3, respectively. *Staphylococcus aureus* strains USA300 LAC, JE2 and *fadX::tn* transposon mutant  
102 (obtained from the Nebraska Transposon Mutant Library) were routinely cultured aerobically at 37°C on  
103 LB agar (IBI Scientific IB49020) or with shaking at 220 rpm in LB broth, both supplemented as needed

104 with 10  $\mu\text{g}/\text{mL}$  chloramphenicol (Cm, Teknova C0325)<sup>6,15</sup>. *S. aureus* was also grown in cell free  
105 supernatants (CFS) of *Fusobacterium nucleatum* ATCC 25586 that had been cultured anaerobically for  
106 48 h in BBL Brucella Broth (BD 2011088) supplemented with 250  $\mu\text{g}/\text{mL}$  and 50  $\mu\text{g}/\text{mL}$  of hemin and  
107 vitamin K (Hardy Diagnostics Z237), respectively. To test the effects of specific SCFAs on *S. aureus*  
108 growth and gene expression, the sodium salts of acetate (Fisher Scientific S209), propionate (Sigma  
109 P1880), or butyrate (Sigma 303410) were added at various concentrations to LB then passed through a  
110 0.22  $\mu\text{m}$  polyethersulfone (PES) filter prior to use. *Escherichia coli* strain One Shot TOP10  
111 (ThermoFisher Scientific C404010) was used for cloning the *fadX* mutagenesis plasmid while *E. coli*  
112 DC10B was used for plasmid passaging to prevent cytosine methylation to facilitate easier transfer to *S.*  
113 *aureus*. *E. coli* strains were routinely grown on and in LB with 20  $\mu\text{g}/\text{mL}$  Cm or 100  $\mu\text{g}/\text{mL}$  ampicillin  
114 (Amresco 0339) as needed.

115 **Growth curves.** Overnight cultures of wild type *S. aureus* and various mutants were diluted 1:100 in  
116 sterile PBS, then 5  $\mu\text{L}$  was added to 195  $\mu\text{L}$  of growth medium per well in a 96 well microtitre dish. Plates  
117 were incubated at 37°C for 24 h in a BioTek Synergy H1 microplate reader for 24 h, with five seconds of  
118 orbital shaking performed prior to hourly OD<sub>600</sub> readings.

119 **Biofilm quantification.** The crystal violet staining of biofilm material was performed according to Merritt  
120 et al<sup>16</sup>. Briefly, overnight *S. aureus* LB cultures were centrifuged at 5,000 rpm for 5 minutes and washed  
121 once with sterile PBS. They were sub-cultured 1:100 into fresh media in a 96 well microtiter plate and  
122 incubated statically at 37°C for 48 h, after which time the OD<sub>600</sub> values were recorded in a BioTek Synergy  
123 H1 microplate reader. Plates were then inverted to remove the cultures, washed three times in water,  
124 and allowed to dry. The wells were stained with 0.1% w/v crystal violet for 15 minutes at room  
125 temperature. The crystal violet was removed, and the plates were washed a further three times in water  
126 and allowed to dry. The dye was solubilized with 30% acetic acid for 15 minutes and then the absorbance  
127 at 560 nm was recorded. The OD<sub>560</sub> was normalized to the OD<sub>600</sub> for each well to generate the final  
128 values.

129 **RNA extraction.** For *S. aureus* growth in anaerobe cell-free supernatants and in LB with or without SCFA  
130 supplementation, 2 mL of growth medium was inoculated 1:100 with *S. aureus* overnight LB cultures and  
131 grown at 37°C with shaking at 220 rpm. Growth of each culture was monitored until they reached an  
132 OD<sub>600</sub> of ~0.2 to 0.3, after which they were centrifuged for 1 min at 14,000 rpm. Supernatants were  
133 discarded, and pellets suspended in 50 µL of fresh LB supplemented with 20 µg/mL of lysostaphin  
134 (Sigma-Aldrich L7386). These were then incubated in a 37°C water bath for 15-20 min or until the  
135 suspension cleared (no longer than 30 min). One mL of TRIzol Reagent (ThermoFisher 15596018) was  
136 added to the lysate, pipetted gently until mixed, and incubated at room temperature (RT) for 5 min. 200  
137 µL of chloroform (VWR 0757) was added per tube and samples were vigorously shaken for 15 s, then  
138 incubated at RT for 5 min. Phase separation was performed by centrifugation at 12,000 rpm for 15 min  
139 at 4°C. ~500 µL of the aqueous phase was removed and added to 500 µL of 95% ethanol (Decon  
140 Laboratories, Inc. UN1170), vortexed for 5 s and incubated at RT for 5 min. RNA was then isolated using  
141 the Zymo RNA Clean & Concentrator-5 kit according to the manufacturer's instructions, including an on-  
142 column DNase I treatment.

143 **NanoString analysis of *S. aureus* gene expression.** A custom NanoString probe set (Table S4) was  
144 designed to target transcripts for several key *S. aureus* virulence factors, metabolic genes, and global  
145 regulators. The probe set also included six housekeeping genes for normalization. DNase I-treated RNA  
146 from *S. aureus* grown in triplicate to OD<sub>600</sub> ~0.2 to 0.3 in control medium (Brucella Broth, BB) or 48 h cell-  
147 free supernatants from *F. nucleatum* (Fn CFS) was submitted to the University of Minnesota Genomics  
148 Center (UMGC) for hybridization to the custom probe set. Raw data were imported into the nSolver  
149 Advanced Analysis software package for normalization and differential gene expression analysis using  
150 default settings. Transcripts were considered differentially expressed if their levels changed by two-fold  
151 and the Benjamini-Hochberg adjusted p-value was less than 0.05. The heatmap was constructed using  
152 the pheatmap package (v.1.0.12) in R (v.4.1.0)<sup>17</sup>.

153 **Reverse transcription and quantitative real-time PCR.** 1.5 µg of RNA was reverse transcribed using  
154 M-MuLV Reverse Transcriptase (NEB M0253L) following the manufacturer's protocol. cDNA was diluted

155 1:15 in sterile water prior to use in qRT-PCR using SsoAdvanced Universal SYBR Green Supermix (Bio  
156 Rad 1725271). PCR products for each gene being assayed (see Table S3 for primer sequences) were  
157 used to construct standard curves for quantification. To determine relative copy number, transcript levels  
158 were normalized to the housekeeping gene *gmk* (guanylate kinase), which was confirmed to be  
159 consistent across growth conditions.

160 **Construction of a *S. aureus*  $\Delta$ *fadX* deletion mutant.** ~500 bp sequences flanking the *fadX* gene  
161 (*SAUSA300\_0229*) were amplified by PCR using Q5 DNA Polymerase (NEB M0491L). For cloning  
162 purposes, the upstream amplicon contained a 5' KpnI restriction site and the downstream amplicon  
163 contained a 3' SacI site, while the internal ends contained complementary overhangs to facilitate overlap  
164 extension PCR to fuse the fragments together. The final product was a ~1 kb fragment encoding the first  
165 11 codons and the stop codon of *fadX*. The amplicon was digested with KpnI-HF (NEB R3142S) and  
166 SacI-HF (NEB R3156S) and cloned into the temperature sensitive, counter-selectable mutagenesis  
167 plasmid pIMAY with T4 DNA ligase (NEB M0202)<sup>18</sup>. The  $\Delta$ *fadX* plasmid was transformed into *E. coli*  
168 DC10B, then electroporated (2900 V, 25  $\mu$ F, 100  $\Omega$ ) in a 2 mm cuvette into *S. aureus*. The culture was  
169 grown at the plasmid replication permissive temperature of 28°C with shaking for 4 h, after which time it  
170 was plated onto LB + 10  $\mu$ g/mL Cm and incubated on the benchtop for 48 h. The single colony that was  
171 obtained was streaked onto two LB + Cm plates. One was incubated on the benchtop for 48 h to generate  
172 a freezer stock and the other was incubated at 37°C. Cm-resistant colonies were screened via PCR for  
173 chromosomal integration of the plasmid. Positive colonies were grown in LB in the absence of selection  
174 at 37°C for 24 h, subcultured 1:1000 into fresh LB for another 24 h, then plated onto LB + 1  $\mu$ g/mL  
175 anhydrotetracycline hydrochloride (Sigma Aldrich 37919) for counter-selection via induction of the TetR-  
176 regulated *secY* antisense RNA and incubated overnight at 37°C. Resultant colonies were patched onto  
177 fresh counter-selection agar and LB + Cm to screen for loss of the plasmid. Cm-sensitive clones were  
178 screened by PCR for loss of *fadX* coding sequence and four were confirmed as mutants by Sanger  
179 sequencing.

180 **HPLC method for extraction and measurement of organic acids in complex media.** Reversed-phase  
181 high-performance liquid chromatography (HPLC) was used for the targeted quantification of acetate,



182 butyrate, and propionate in cell free supernatants. Organic acids of interest were purified from complex  
183 media components through a modified liquid-liquid extraction method<sup>19</sup>. To account for analyte loss  
184 during extraction, 100 $\mu$ L of 0.2M succinate was added as an internal standard to 2mLs of each sample  
185 (9.5mM final concentration)<sup>19</sup>. After equilibration at room temperature for 5 min, 200 $\mu$ L of 12N HCl was  
186 added, and samples were vortexed for 15 seconds. 10mL of diethyl ether was then added to each sample  
187 before gently rolling them for a total of 30 min. After centrifugation for 5 min at 4000rpm, supernatants  
188 were transferred to a new extraction tube and 1mL of 1M NaOH was added before gently rolling for  
189 another 30 min. The resulting aqueous phase was extracted and transferred to an autosampler vial  
190 followed by addition of 100 $\mu$ L of 12N HCL before vortexing and storage at 4°C until analysis.

191 Samples were analyzed using a Dionex UltiMate 3000 UHPLC (Thermo Fisher) system equipped  
192 with a reversed-phase Acclaim Organic Acid (OA) Column (5 $\mu$ m, 120 A, 4.0 X 250mm). 8 $\mu$ L of each  
193 sample was injected and separation was achieved using a 32-minute isocratic instrument method (1.0  
194 mL/min, 30°C) employing Na<sub>2</sub>SO<sub>4</sub> (100mM, pH 2.6) as the mobile phase. The column was allowed to  
195 equilibrate for 8 min prior to sample injection. Absorbance was monitored at 210nm to identify compounds  
196 with a carboxylic acid functional group. Chromatograms were processed using Dionex Chromeleon 7  
197 (Thermo Fisher) Chromatography Data System. Cobra Wizard was used to reproducibly identify and gate  
198 peaks of interest.

199 **Isolation and genome sequencing of butyrate resistant mutants.** The  $\Delta$ *fadX* mutant was grown for  
200 24 hours in LB, serially diluted, plated onto LB supplemented with 200 mM sodium butyrate, and  
201 incubated overnight at 37°C. Four large colonies were re-streaked onto the same media to confirm their  
202 ability to grow in the presence of butyrate. Genomic DNA was then isolated from our *S. aureus* USA300  
203 LAC isolate and butyrate-resistant mutants using the PowerSoil Pro kit (Qiagen 47014). Overnight  
204 cultures were pelleted and suspended in 200  $\mu$ L of an enzymatic lysis buffer (20 mM Tris-HCl, 2 mM  
205 EDTA, 1.2% (vol/vol) Triton X-100, and 20  $\mu$ g/mL lysostaphin) for 30 min at 37°C. Lysates were  
206 transferred to Power Bead tubes and the manufacturer's protocol was followed with no further alterations.  
207 Genomic DNA was processed and sequenced on the Illumina MiSeq platform at the Microbial Genome

208 Sequencing Center (MiGS, Pittsburgh, PA). Raw paired-end fastq files were imported into Geneious  
209 v.2022.0.1 and trimmed for quality using BBDuk with the following settings: Set ORDERED to true, k=27,  
210 mink=6, maskMiddle=true, hamming distance=1, right-ktrimming using 1 reference, quality-trimming both  
211 ends to Q30. Trimmed reads for our USA300 isolate were mapped to the *S. aureus* subsp. *aureus*  
212 USA300\_FPR3757 reference genome (CP000255) using the Geneious Mapper on medium-low  
213 sensitivity with a minimum mapping quality of 20 and only mapping reads whose pair mapped  
214 appropriately nearby. The assembled USA300 genome was then used as the reference against which  
215 reads from the butyrate resistant mutants were mapped using the same quality trimming and mapping  
216 strategy detailed above. Putative SNPs and indels were detected using the “Find Variations/SNPS...”  
217 function within Geneious, requiring occurrence of the variation in >90% of reads, with a minimum of 10  
218 reads.

219 **Data availability.** Raw sequences were deposited at NCBI’s Sequence Read Archive (SRA) with the  
220 BioProject ID PRJNA798706.

221

## 222 **RESULTS**

223 ***S. aureus* growth is impaired by *F. nucleatum*.** In a previous study of upper airway (CRS) microbiota,  
224 we found that in patients (n=27) with detectable *Fusobacterium*, relative abundances of *Staphylococcus*  
225 were minimal or below the level of detection (Fig. 1A)<sup>6</sup>. When *S. aureus* was grown in supernatants  
226 derived from anaerobic enrichment cultures of CRS sinus mucus, it exhibited slower growth in those that  
227 had *Fusobacterium* as a core constituent genus of the enrichment community. These supernatants also  
228 contained higher levels of the short-chain fatty acids (SCFAs) propionate and butyrate<sup>6</sup>. Given these  
229 data, we hypothesized that *Fusobacterium* spp. exert an antagonistic effect on *S. aureus* through the  
230 production of SCFAs. To test this, we grew *S. aureus* USA300 LAC in filtered cell-free supernatants  
231 (CFS) from *F. nucleatum* ATCC 25586 grown for 48 h in Brucella Broth (BB) supplemented with hemin  
232 and vitamin K (Fig. 1B). *S. aureus* grew in Fn CFS, albeit slower than in the control medium (BB) with an  
233 increased lag phase. However, both cultures reached approximately similar OD<sub>600</sub> values by 24 h,  
234 indicating that *S. aureus* was able to obtain sufficient nutrients over the course of the experiment. We

235 reasoned that the extended lag phase was likely due to *F. nucleatum*-mediated depletion of an easily  
236 metabolizable nutrient source and/or the presence of an inhibitory metabolite(s) that *S. aureus* was able  
237 to adapt to over time. We tested the latter by measuring acetate, propionate, and butyrate content of the  
238 CFS before and after *S. aureus* growth (Fig. 1C). All three SCFAs were detected in *F. nucleatum* CFS  
239 (~5mM acetate, ~5mM propionate, ~15mM butyrate). After overnight growth (~16 h) in *F. nucleatum*  
240 supernatants, *S. aureus* cultures had increased acetate levels, while propionate and butyrate remained  
241 the same as in CFS alone, indicating that *S. aureus* does not actively metabolize the latter two SCFAs  
242 under these conditions. We interpret this to mean that *S. aureus* adapts to SCFAs by modifying its  
243 physiology rather than directly detoxifying them via degradation. The increased acetate levels are likely  
244 due to *S. aureus* utilization of glucose remaining in Fn CFS, as *F. nucleatum* preferentially ferments  
245 amino acids<sup>20,21</sup>. Given that *S. aureus* growth is similarly impaired when BB is supplemented with the  
246 sodium salts of acetate (5mM), propionate (5mM), and butyrate (15mM)(Fig. 1B), these data suggest that  
247 SCFAs may be key factors driving bacterial interactions in the CRS sinus environment, providing a  
248 mechanism by which *Fusobacterium* and other anaerobes may restrict *S. aureus* growth *in vivo*.

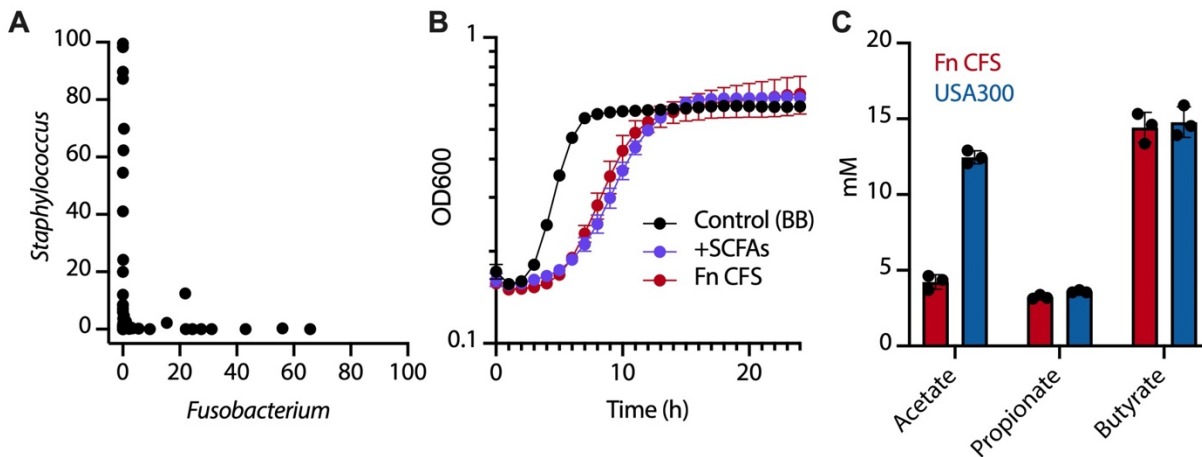

249

250 **Figure 1. *S. aureus* growth is impaired in *F. nucleatum* supernatants.** **A)** Relative abundances of *Fusobacterium* and  
251 *Staphylococcus* in sinus mucus from patients with chronic rhinosinusitis are inversely correlated (Lucas, et al 2021). **B)**  
252 Representative growth curve of *S. aureus* USA300 in brucella broth (BB, control), BB supplemented with 5mM acetate, 5mM  
253 propionate, and 15mM butyrate, and cell-free supernatants from *F. nucleatum* (Fn CFS). **C)** Production of SCFAs by *F.*  
254 *nucleatum* after 48h (Fn CFS) and their levels after *S. aureus* (USA300) growth in Fn CFS.

255 ***F. nucleatum* metabolites significantly alter *S. aureus* gene expression.** We next determined how  
256 *S. aureus* modified its transcriptome in *F. nucleatum* CFS. To do so, we performed a targeted analysis  
257 using a custom NanoString code set (Table S4) that included 34 genes encoding several known virulence  
258 factors, key metabolic genes, and master regulators of gene expression (Fig. 2A). Of these genes, we  
259 detected thirteen differentially expressed transcripts ( $\geq 2$ -fold change in expression and adjusted p-  
260 value  $< 0.05$ ); expression of *fadX*, *cidA*, *icaB*, and *gltB* increased while *nanA*, *alsS*, *lrgA*, *narG*, *agrA*, *hla*,  
261 *hld*, *saeR*, and *ldh1* decreased in *S. aureus* grown on CFS relative to BB alone (Fig. 2B). A number of  
262 other transcripts (*aur*, *fib*, *pgi*, *codY*, *opp3b*, and *arlR*) were statistically significant, but exhibited less than  
263 two-fold change in expression (Table S4). Decreased signaling through the quorum-sensing response  
264 regulator *agrA* in Fn CFS results in lower expression of the *hla* and *hld* genes, encoding alpha and delta  
265 hemolysins<sup>22</sup>. Neuraminate lyase, encoded by *nanA*, is induced by the presence of sialic acids and  
266 exhibited lower expression in Fn CFS, indicating that *F. nucleatum* likely utilized sialic acids present in  
267 Brucella Broth as a nutrient source<sup>23,24</sup>. Expression of the nutrient-sensing transcriptional regulator *codY*  
268 was reduced in Fn CFS by nearly 50% compared to the control medium, likely explaining the increase in  
269 the glutamate synthase subunit gene *gltB*<sup>25</sup>. We selected three genes (*fadX*, *agrA*, and *nanA*) for  
270 validation via quantitative reverse-transcription PCR and show that they were highly correlated with the  
271 NanoString results (Fig. S1). That nearly half of the transcripts in the NanoString probe set are  
272 differentially regulated in Fn CFS, including a number of major transcriptional regulators important for  
273 integrating metabolic cues and virulence gene expression, highlights the global nature of alterations to  
274 the *S. aureus* transcriptome. These data show that *S. aureus* physiology can be significantly influenced  
275 by the metabolic activity of a single anaerobic species and underscore the possible complexity of bacterial  
276 behaviors and interactions within a diverse CRS community.

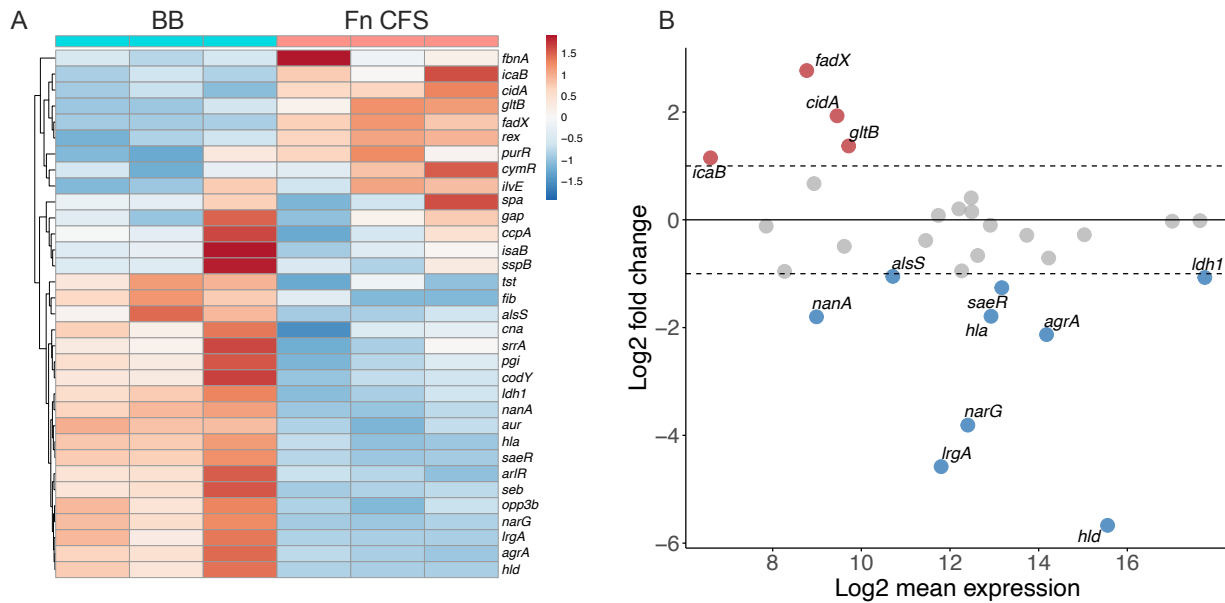

279 **Figure 2. *F. nucleatum* metabolites significantly impact the *S. aureus* transcriptome.** **A)** Heatmap depicting  
 280 log<sub>10</sub>-transformed *S. aureus* gene expression in control media (BB) and *F. nucleatum* supernatant (CFS) as  
 281 detected by NanoString. Genes were clustered with unsupervised hierarchical clustering. **B)** MA plot representation  
 282 of *S. aureus* gene expression in Fn CFS relative to the control medium. Genes were considered significant if they  
 283 had a log<sub>2</sub> fold change  $\geq 1$  and a Benjamini-Hochberg adjusted p-value  $< 0.05$ .  
 284

285

286 **SCFAs significantly alter *S. aureus* gene expression.** SCFAs, especially propionate and butyrate,  
 287 have been reported to impair *S. aureus* growth and attenuate murine skin infections<sup>26</sup>. We therefore  
 288 sought to determine if individual SCFAs were sufficient to drive some of the *S. aureus* gene expression  
 289 patterns observed after growth in Fn CFS. To measure the effects of each SCFA on the *agr* quorum  
 290 sensing system, we grew *S. aureus* carrying pAH1 (encoding P<sub>*agr*</sub>-*mCherry*) in LB or LB supplemented  
 291 with acetate, propionate, or butyrate for 24 h and measured fluorescence intensity normalized to culture  
 292 density (Fig. 3A). All three SCFAs led to decreased fluorescence, with propionate (p=0.0035) and  
 293 butyrate (p<0.0001) significantly inhibiting reporter activity, while acetate (p=0.203) had the least effect.  
 294 Given these observations, CRS bacterial communities dominated by *Fusobacterium* and other taxa that  
 295 produce propionate and butyrate would not only be predicted to impede the growth of *S. aureus*, but also  
 296 minimize the production of *agr*-regulated virulence factors.

297 Given the reduction in *agr* quorum sensing activity and thus lack of repression of proteins involved  
 298 in surface attachment, we hypothesized that SCFAs may be a pro-biofilm signal to *S. aureus*<sup>27</sup>. We

299 performed qRT-PCR on *S. aureus* grown to OD<sub>600</sub> ~0.2-0.3 in LB or LB supplemented with 100 mM of  
300 each individual SCFA to determine if biofilm-associated transcripts identified as differentially regulated in  
301 Fn CFS were affected. We found that expression of *cidA*, encoding a holin-like protein involved in  
302 programmed cell death and extracellular DNA release during biofilm formation, was approximately ten-  
303 fold higher ( $p < 0.0001$ ) in the presence of propionate, but was relatively unaffected by acetate or butyrate  
304 (Fig. 3B)<sup>28</sup>. Conversely, there was no effect of SCFAs on the expression of *lrgA*, which encodes a putative  
305 anti-holin that is antagonistic to CidA<sup>28</sup>. This suggests that decreased *lrgA* expression detected in Fn CFS  
306 is likely independent of the SCFAs tested here (Fig. 3C). Despite increased *cidA* expression, SCFA  
307 supplementation of LB had marginal effects on biofilm production, with acetate and propionate leading  
308 inducing modest but insignificant increases relative to LB alone, and butyrate having no detectable effect  
309 (Fig. 3D). The lack of downregulation of *lrgA* under these conditions suggests that sufficient LrgA protein  
310 may be available to offset any increased CidA activity. Alternatively, other environmental cues may be  
311 needed to enhance biofilm formation under these conditions.

312

313

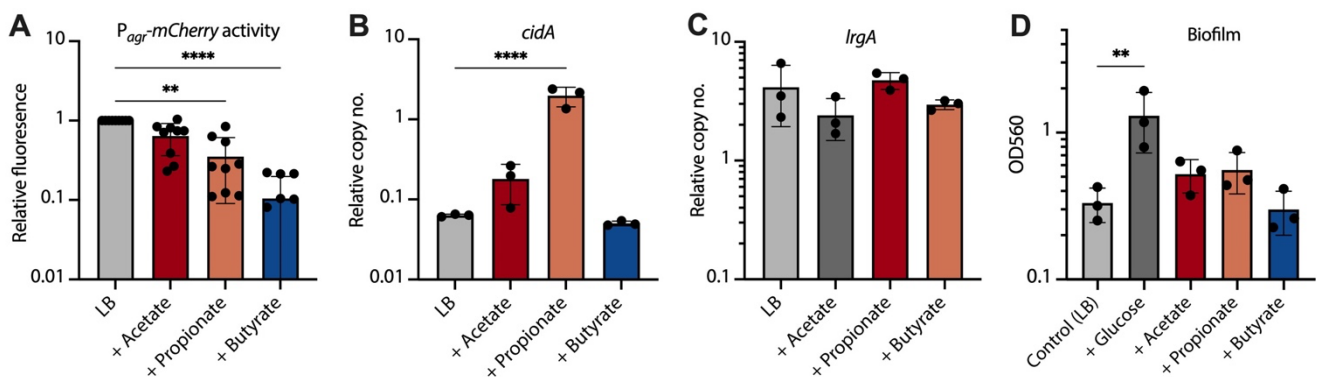

314

315 **Fig. 3. Propionate and butyrate repress the *S. aureus agr* system but fail to induce biofilm.** **A)** *S. aureus*  
316 carrying pAH1 (*P<sub>agr</sub>-mCherry*) was grown for 24 hours in LB supplemented with 100 mM of sodium acetate,  
317 propionate, or butyrate (n=3 biological replicates with n=3 cultures per replicate). Fluorescence was measured and  
318 normalized to culture density for each replicate, then normalized to the LB controls. **B, C)** Expression of *cidA* and  
319 *lrgA* from *S. aureus* in LB supplemented with SCFAs (n=3). Copy number was determined via standard curve and  
320 normalized to the *gmk* housekeeping gene. **D)** Crystal violet assay quantifying biofilm formation in LB, LB  
321 supplemented with glucose (positive control for increased biofilm formation), or LB supplemented with 100 mM of  
322 each SCFA.

323 **The *fadX* gene mediates propionate resistance.** The most highly induced transcript in *S. aureus* grown  
324 in Fn CFS was *fadX*, encoding a putative propionate CoA-transferase, the first in a five gene operon  
325 predicted to be involved in fatty acid degradation. Given their annotation, we hypothesized that the *fad*  
326 operon may encode a component of the *S. aureus* SCFA stress response. The *fad* genes were induced  
327 after growth in Fn CFS and in the presence of propionate and butyrate; their status as an operon was  
328 confirmed by obtaining amplicons from cDNA using PCR primer sets that spanned each intergenic region  
329 (Fig. 4, Fig. S2). We tested a *fadX* transposon mutant (obtained from the Nebraska Transposon Mutant  
330 Library) and its parental strain (JE2) for the ability to grow in 100 mM propionate, and found that *fadX*::tn  
331 had a significant growth defect in propionate relative to the wild type (Fig. S3). The mutant grew as well  
332 as the parent strain in LB alone, indicating that growth inhibition was specific to propionate in the medium.  
333 We then performed dose-response growth curves in six concentrations of sodium propionate, ranging  
334 from 100 mM to 3.125 mM in two-fold reductions, and found clear growth differences between JE2 and  
335 *fadX*::tn, with the mutant having a defect in media with as low as 12.5 mM (Fig. S4A).

336 To determine if the transposon insertion in the *fadX*::tn mutant disrupted the entire *fad* operon,  
337 we performed qRT-PCR and confirmed that the three genes downstream of *fadX* had considerably  
338 reduced expression in LB (Fig. S4B). We therefore constructed a  $\Delta$ *fadX* deletion mutant in the USA300  
339 LAC background and tested its growth in LB supplemented with each SCFA (Fig. 5). Relative to wild  
340 type, there was no growth defect in acetate, however there was modest inhibition of the mutant in  
341 propionate, with growth curves diverging after approximately 8-10 hours and remaining consistent  
342 through the end of the experiments. Neither strain grew well in butyrate, though sporadic growth was  
343 detected after ~15 h, irrespective of genotype and only in butyrate. Together, these data implicate FadX  
344 in ameliorating or resisting propionate stress, though the mechanism remains unclear. Further, the  
345 occasional growth of either strain at later time points in butyrate, but not propionate, provides indirect  
346 evidence that these SCFAs may have different mechanisms of *S. aureus* growth inhibition.

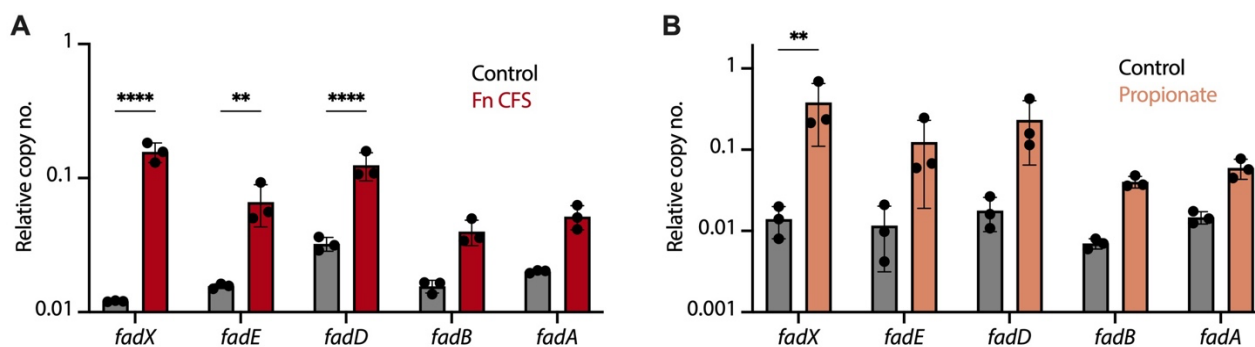

347

348 **Figure 4. The *fad* operon is induced by propionate and butyrate.** **A)** Quantitative reverse transcription PCR was  
 349 used to detect *fad* operon expression in control (BB) or Fn CFS, or **B)** in LB supplemented with 100 mM sodium  
 350 propionate. Cultures were grown to an OD<sub>600</sub> of approximately 0.2-0.3 prior to RNA extraction. Data shown are  
 351 mean +/- standard deviation of three biological replicates.

352  
 353

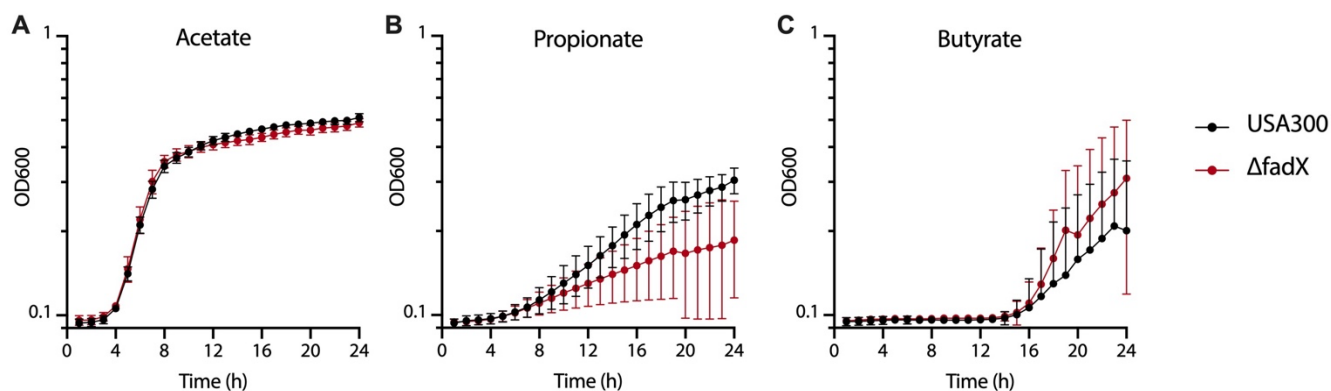

354

355 **Figure 5. The  $\Delta fadX$  mutant is more susceptible to growth inhibition by propionate than wild type.** Combined  
 356 growth curves (n=4) of wild type USA300 or the  $\Delta fadX$  mutant in 100 mM of the sodium salts of **A)** acetate, **B)**  
 357 propionate, or **C)** butyrate. Data shown are the mean +/- standard deviation of three biological replicates.

358

359

360 ***codY* mutants are resistant to butyrate.**

361 Although occasional growth was detected in LB supplemented with butyrate after ~15 hours of  
 362 incubation, it consistently occurred in only one of three technical replicates of a given sample (either wild  
 363 type or  $\Delta fadX$ ). These wells were plated onto LB and mannitol salt agar to confirm the absence of  
 364 contamination and that the observed turbidity was due solely to *S. aureus* growth. To further investigate  
 365 this phenomenon, we grew the  $\Delta fadX$  mutant for 24 h in LB, then plated ten-fold serial dilutions onto LB  
 366 agar + 200 mM sodium butyrate. Large colonies were occasionally observed in the 10<sup>-2</sup> dilutions after  
 367 overnight incubation, which we assumed to be due to increased resistance to butyrate. Patching these



368 colonies onto the same medium confirmed their resistance phenotype. We interpret these data to mean  
369 that butyrate resistant mutants arose spontaneously in LB starter cultures, and that the occasional  
370 turbidity in LB + butyrate cultures after ~15 hours represents growth after an extended lag phase resulting  
371 from their extremely low starting abundance.

372 Growth curves in each SCFA were then performed to determine if the large colonies had a growth  
373 advantage over the parental strain. We found that all four large colonies grew significantly faster in the  
374 presence of butyrate than the parental strain, yet there were no differences in media supplemented with  
375 acetate or propionate (Fig. 6A-C). We then sequenced their genomes to identify genetic determinant(s)  
376 of butyrate resistance, and found two independent mutations in the gene encoding the GTP- and  
377 branched chain amino acid-sensing global regulator CodY. The first mutation resulted in a premature  
378 stop codon truncating the protein after 65 amino acids, while the second led to a 20 amino acid deletion  
379 from a conserved region of the protein at codons 171-190 (Fig. 6D). We repeated growth curves using a  
380 JE2 *codY::tn* mutant (with an intact *fadX* gene) and confirmed that *codY* mutation alone was sufficient to  
381 rescue growth in the presence of butyrate (Fig. 7A). Finally, we performed qRT-PCR on JE2 and the  
382 *codY::tn* mutant to assay for *fad* operon expression and found that while the operon was modestly  
383 induced in the mutant, none of the genes reached significance (Fig. 7B). These data, coupled with the  
384 fact that *codY* mutants have similar levels of growth impairment in propionate is further evidence that  
385 propionate and butyrate may act on different targets to inhibit *S. aureus* growth.

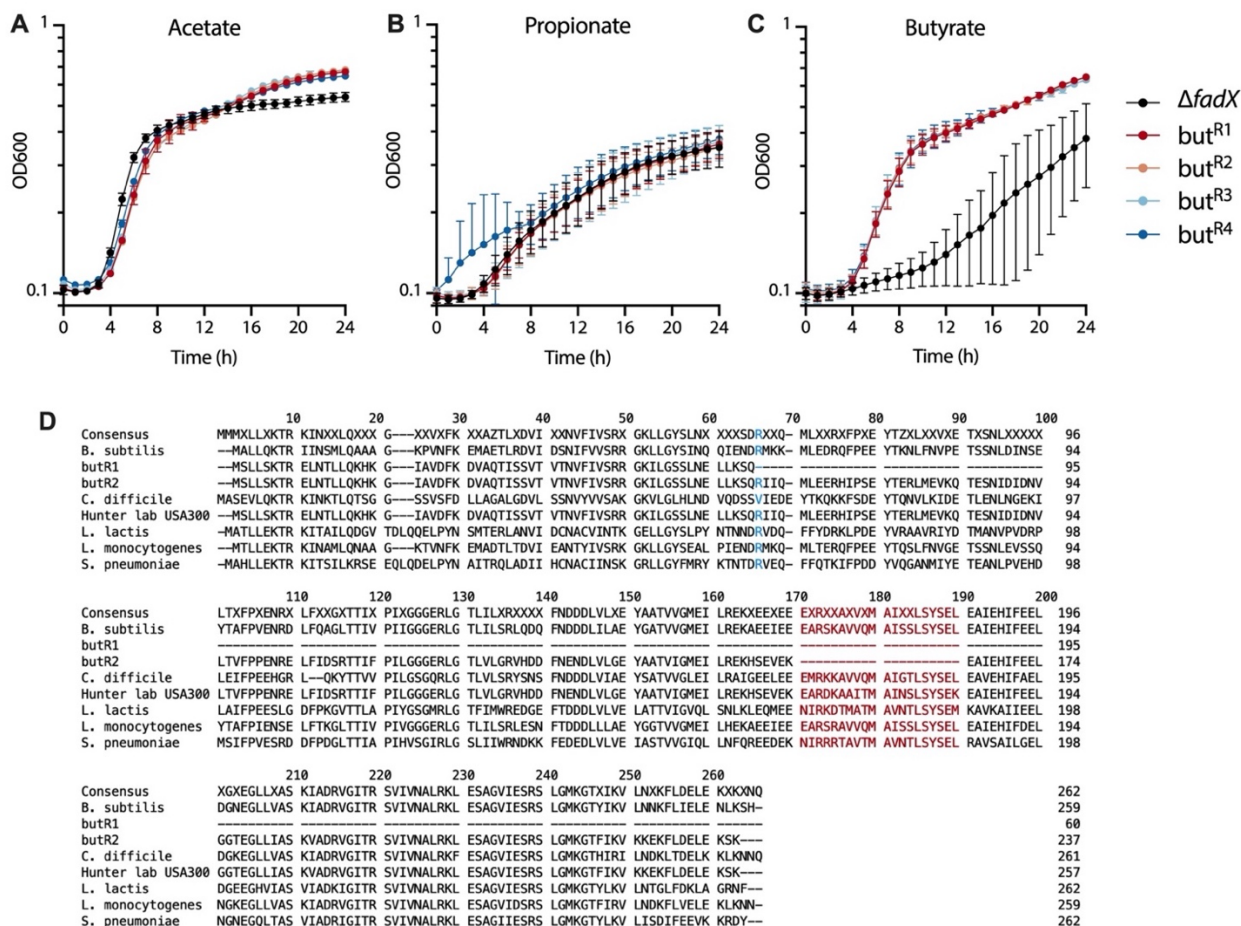

386

387 **Figure 6. Spontaneous *S. aureus* *codY* mutants are not inhibited by butyrate.** Combined growth curves of the  
 388  $\Delta$ *fadX* mutant and butyrate-resistant derivatives in 100 mM **A)** sodium acetate, **B)** sodium propionate, or **C)** sodium  
 389 butyrate. **D)** Alignment of CodY protein sequences from diverse Gram-positive bacteria and *S. aureus*, including  
 390 butyrate resistant mutants (*but*<sup>R1</sup> and *but*<sup>R2</sup>). *but*<sup>R1</sup> encodes a premature stop codon at position 66 (blue), while  
 391 *but*<sup>R2-4</sup> mutants have a 20 amino acid deletion from positions 171-190 (red). *but*<sup>R3</sup> and *but*<sup>R4</sup> mutants were omitted  
 392 from the alignment as their *codY* mutations are identical to *but*<sup>R2</sup>.  
 393

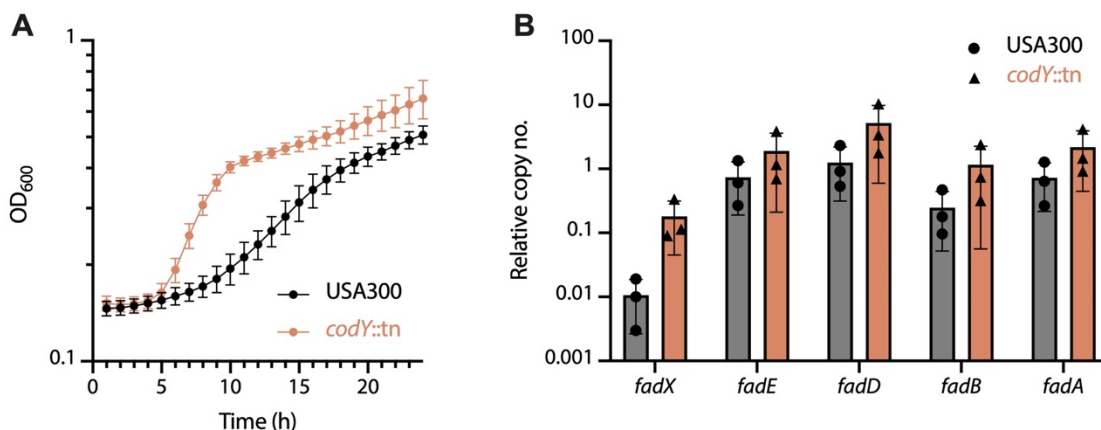

394

395 **Figure 7. *codY* mutation is sufficient to escape butyrate growth inhibition, though not likely through Fad**  
 396 **activity.** **A)** Growth of wild type *S. aureus* and a *codY::tn* mutant in 100 mM sodium butyrate. **B)** Expression of the  
 397 *fad* operon from the same strains as in A, grown in LB to an OD<sub>600</sub> of approximately 0.2-0.3.

## 398 DISCUSSION

399 Although not lethal, CRS remains a significant source of morbidity for a large percentage of the population  
400 (~15%), and recalcitrance to antibiotic therapy often requires invasive surgical intervention<sup>5</sup>. The recent  
401 advances in bacterial community profiling by 16S amplicon sequencing has revealed extensive  
402 colonization of CRS sinus mucus with oral anaerobes and other taxa not frequently observed via  
403 traditional culture-based methods<sup>4,6</sup>. While *S. aureus* is appreciated as a significant CRS pathogen, it  
404 coexists with these communities and must adapt to the sinonasal microenvironment shaped by both host  
405 and microbial processes. Many of the anaerobes associated with CRS release nutrients in the form sialic  
406 acid and other carbohydrates, peptides and amino acids, and byproducts of mixed-acid fermentation<sup>6</sup>.  
407 One such class of metabolites, short-chain fatty acids, are derived from amino acid-fermenting  
408 anaerobes, particularly members of the *Fusobacterium* genus<sup>29</sup>. Our goals in this work were to (i)  
409 determine if *Fusobacterium nucleatum*, a model member of the Fusobacteria, could impair *S. aureus*  
410 growth, (ii) characterize the response of *S. aureus* to individual SCFAs, and (iii) identify potential  
411 mechanisms of SCFA stress.

412 We show that *F. nucleatum* produces millimolar amounts of the SCFAs acetate, propionate, and  
413 butyrate, and that *S. aureus* has an extended lag phase and significant alterations to its transcriptome  
414 when grown in *F. nucleatum* supernatants or control medium supplemented with SCFAs. Consistent with  
415 a prior study, propionate and butyrate were both inhibitory to *S. aureus* growth, though we found that  
416 butyrate was more potent in this regard<sup>26</sup>. Both SCFAs were sufficient to reduce expression of the master  
417 regulator of virulence, *agrA*, and alter expression of metabolic pathways (*cidA* and the *fad* operon), in  
418 support of the hypothesis that SCFAs were responsible for altered gene expression and the delayed lag  
419 phase in *F. nucleatum* supernatants. Reduced *agr*-regulated virulence factor output may alter the  
420 inflammatory tone of the CRS sinus environment, with the host response instead being directed towards  
421 members of the anaerobic community rather than *S. aureus*. In support of this idea, CRS patients have  
422 been reported to have circulating antibodies targeting *Fusobacterium* and *Prevotella*, members of which  
423 were enriched in CRS sinus mucus in our previous study, and that they show a decline in these antibodies  
424 after successful antibiotic therapy<sup>6,30</sup>. Alternatively, butyrate produced by anaerobes in the CRS sinus

425 environment may occasionally select for *S. aureus codY* mutants, whose growth inhibition would be  
426 relieved<sup>31</sup>. Such mutants overproduce numerous virulence factors, and as such, may exacerbate the  
427 inflammatory response<sup>32</sup>. Whatever the case, the recent development of robust animal models of CRS  
428 will facilitate our ability to test these hypotheses *in vivo*<sup>33,34</sup>.

429         While the mechanisms of action of propionate and butyrate on *S. aureus* are still unclear, our data  
430 suggest that they may act on different targets. Propionate induced expression of the *fad* operon and a  
431 *fadX* mutant exhibited worse growth in its presence than did the wild type strain. The *fad* operon  
432 annotation suggests a role in fatty acid degradation, though it is unlikely that it acts directly on propionate,  
433 as *S. aureus* showed no evidence of metabolizing it over time (Fig. 1C). Another possibility is that  
434 propionate induces lipid membrane stress, and the Fad proteins may act to degrade or repair damaged  
435 lipid species. This consistent with recent findings from human gut commensal *Bacteroides*, where  
436 butyrate (rather than propionate) induced membrane stress in a species- and context-dependent  
437 manner<sup>35</sup>. Butyryl-CoA levels were increased by Acyl-CoA enzymatic activity, suggesting that other CoA-  
438 regulated enzymes could be starved of an essential cofactor, likely impairing several metabolic processes.  
439 While butyrate also induced expression of *fadX*, we did not detect a mutant phenotype in LB  
440 supplemented with 100 mM butyrate, suggesting that the other members of the *fad* operon may  
441 compensate for the loss of *fadX* under these conditions, or that they are less important for the response  
442 to butyrate. Interestingly, we readily obtained spontaneous butyrate resistance in the form of *codY*  
443 mutations, while we did not for propionate. Further, butyrate resistant *codY* mutants were as sensitive to  
444 propionate as the parent strain, suggesting that each SCFA may have unique mechanisms of action on  
445 *S. aureus*. CodY is an allosteric transcriptional regulator whose affinity for specific motifs in promoter  
446 regions is dictated by the levels of GTP and branched chain amino acids in the cell<sup>36</sup>. As it regulates  
447 hundreds of genes in *S. aureus*, determining which CodY target(s) are responsible for bypassing  
448 butyrate-mediated growth inhibition are beyond the scope of this work, though transposon screens in a  
449 *codY* mutant background may prove fruitful in this regard.

450         In summary, we have identified a possible mechanism by which anaerobic bacteria in  
451 polymicrobial airway infections may influence *S. aureus* growth and physiology via the activity of the

452 short-chain fatty acids propionate and butyrate, and have identified the *fad* operon and the CodY regulon  
453 as possible mechanisms of resistance, respectively. Our study has some limitations, as the experiments  
454 were performed in *F. nucleatum* supernatants *in vitro* and in defined media conditions rather than in the  
455 context of intact anaerobic communities or two-species co-cultures. Additionally, our experiments lack  
456 the potential contributions of the host, such as reactive oxygen and nitrogen species, or cationic  
457 antimicrobial peptides<sup>37,38</sup>. Despite these limitations, the genetic approach taken here is informative and  
458 amenable to translation into animal models for further dissection of the effects of CRS bacterial  
459 communities on *S. aureus* pathogenesis.

460

## 461 **ACKNOWLEDGEMENTS**

462 We acknowledge the UMN Genomics Center and Paige Marsolek for NanoString assistance, and  
463 members of the Hunter laboratory for critical feedback on the manuscript. This work was supported by a  
464 National Institute of Dental and Craniofacial T32 Fellowship (#T90DE0227232) awarded to JRF, a  
465 National Heart, Lung, and Blood Institute Research Project Grant (1R01HL136919) to RCH, and an  
466 Administrative Research Supplement (HL136919-03S1) to ARV. The funders had no role in study design,  
467 data collection and interpretation, or the decision to submit the work for publication.

468

## 469 **REFERENCES**

- 470 1. Hastan, D. *et al.* Chronic rhinosinusitis in Europe--an underestimated disease. A GA<sup>2</sup>LEN study.  
471 *Allergy* **66**, 1216–1223 (2011).
- 472 2. Orlandi, R. R. *et al.* International Consensus Statement on Allergy and Rhinology: Rhinosinusitis.  
473 *Int Forum Allergy Rhinol* **6 Suppl 1**, S22-209 (2016).
- 474 3. Tu, Y. *et al.* Mucus composition abnormalities in sinonasal mucosa of chronic rhinosinusitis with  
475 and without nasal polyps. *Inflammation* (2021) doi:10.1007/s10753-021-01471-6.
- 476 4. Hoggard, M. *et al.* Evidence of microbiota dysbiosis in chronic rhinosinusitis. *Int Forum Allergy*  
477 *Rhinol* **7**, 230–239 (2017).

- 478 5. Hoggard, M. *et al.* Chronic Rhinosinusitis and the Evolving Understanding of Microbial Ecology in  
479 Chronic Inflammatory Mucosal Disease. *Clin Microbiol Rev* **30**, 321–348 (2017).
- 480 6. Lucas, S. K. *et al.* Anaerobic microbiota derived from the upper airways impact *Staphylococcus*  
481 *aureus* physiology. *Infect Immun* IAI0015321 (2021) doi:10.1128/IAI.00153-21.
- 482 7. Bhattacharyya, N. Incremental health care utilization and expenditures for chronic rhinosinusitis in  
483 the United States. *Ann Otol Rhinol Laryngol* **120**, 423–427 (2011).
- 484 8. Bhattacharyya, N. & Kepnes, L. J. Assessment of trends in antimicrobial resistance in chronic  
485 rhinosinusitis. *Ann Otol Rhinol Laryngol* **117**, 448–452 (2008).
- 486 9. Feazel, L. M., Robertson, C. E., Ramakrishnan, V. R. & Frank, D. N. Microbiome complexity and  
487 *Staphylococcus aureus* in chronic rhinosinusitis. *Laryngoscope* **122**, 467–472 (2012).
- 488 10. Ramakrishnan, V. R., Feazel, L. M., Abrass, L. J. & Frank, D. N. Prevalence and abundance of  
489 *Staphylococcus aureus* in the middle meatus of patients with chronic rhinosinusitis, nasal polyps,  
490 and asthma. *Int Forum Allergy Rhinol* **3**, 267–271 (2013).
- 491 11. Bardy, J. J. *et al.* *Staphylococcus aureus* from patients with chronic rhinosinusitis show minimal  
492 genetic association between polyp and non-polyp phenotypes. *BMC Ear Nose Throat Disord* **18**, 16  
493 (2018).
- 494 12. Wagner Mackenzie, B. *et al.* Bacterial community collapse: a meta-analysis of the sinonasal  
495 microbiota in chronic rhinosinusitis. *Environ Microbiol* **19**, 381–392 (2017).
- 496 13. Kapatral, V. *et al.* Genome sequence and analysis of the oral bacterium *Fusobacterium nucleatum*  
497 strain ATCC 25586. *J Bacteriol* **184**, 2005–2018 (2002).
- 498 14. Mirković, B. *et al.* The Role of Short-Chain Fatty Acids, Produced by Anaerobic Bacteria, in the  
499 Cystic Fibrosis Airway. *Am J Respir Crit Care Med* **192**, 1314–1324 (2015).
- 500 15. Thurlow, L. R., Joshi, G. S. & Richardson, A. R. Virulence strategies of the dominant USA300  
501 lineage of community-associated methicillin-resistant *Staphylococcus aureus* (CA-MRSA). *FEMS*  
502 *Immunol Med Microbiol* **65**, 5–22 (2012).
- 503 16. Merritt, J. H., Kadouri, D. E. & O’Toole, G. A. Growing and analyzing static biofilms. *Curr Protoc*  
504 *Microbiol* **Chapter 1**, Unit 1B.1 (2005).

- 505 17. Kolde, Raivo. *heatmap*.
- 506 18. Monk, I. R., Shah, I. M., Xu, M., Tan, M.-W. & Foster, T. J. Transforming the untransformable:  
507 application of direct transformation to manipulate genetically *Staphylococcus aureus* and  
508 *Staphylococcus epidermidis*. *mBio* **3**, (2012).
- 509 19. De Baere, S. *et al.* Development of a HPLC-UV method for the quantitative determination of four  
510 short-chain fatty acids and lactic acid produced by intestinal bacteria during in vitro fermentation. *J*  
511 *Pharm Biomed Anal* **80**, 107–115 (2013).
- 512 20. Zilm, P. S., Gully, N. J. & Rogers, A. H. Growth pH and transient increases in amino acid availability  
513 influence polyglucose synthesis by *Fusobacterium nucleatum* grown in continuous culture. *FEMS*  
514 *Microbiol Lett* **215**, 203–208 (2002).
- 515 21. Sadykov, M. R. *et al.* Inactivation of the Pta-AckA pathway causes cell death in *Staphylococcus*  
516 *aureus*. *J Bacteriol* **195**, 3035–3044 (2013).
- 517 22. Janzon, L. & Arvidson, S. The role of the delta-lysin gene (*hld*) in the regulation of virulence genes  
518 by the accessory gene regulator (*agr*) in *Staphylococcus aureus*. *EMBO J* **9**, 1391–1399 (1990).
- 519 23. Olson, M. E., King, J. M., Yahr, T. L. & Horswill, A. R. Sialic acid catabolism in *Staphylococcus*  
520 *aureus*. *J Bacteriol* **195**, 1779–1788 (2013).
- 521 24. Agarwal, K. *et al.* Glycan cross-feeding supports mutualism between *Fusobacterium* and the  
522 vaginal microbiota. *PLoS Biol* **18**, e3000788 (2020).
- 523 25. Pohl, K. *et al.* CodY in *Staphylococcus aureus*: a regulatory link between metabolism and virulence  
524 gene expression. *J Bacteriol* **191**, 2953–2963 (2009).
- 525 26. Jeong, S., Kim, H. Y., Kim, A. R., Yun, C.-H. & Han, S. H. Propionate Ameliorates *Staphylococcus*  
526 *aureus* Skin Infection by Attenuating Bacterial Growth. *Front Microbiol* **10**, 1363 (2019).
- 527 27. Saravia-Otten, P., Müller, H. P. & Arvidson, S. Transcription of *Staphylococcus aureus* fibronectin  
528 binding protein genes is negatively regulated by *agr* and an *agr*-independent mechanism. *J*  
529 *Bacteriol* **179**, 5259–5263 (1997).
- 530 28. Ranjit, D. K., Endres, J. L. & Bayles, K. W. *Staphylococcus aureus* CidA and LrgA proteins exhibit  
531 holin-like properties. *J Bacteriol* **193**, 2468–2476 (2011).

- 532 29. Rogers, A. H., Zilm, P. S., Gully, N. J., Pfennig, A. L. & Marsh, P. D. Aspects of the growth and  
533 metabolism of *Fusobacterium nucleatum* ATCC 10953 in continuous culture. *Oral Microbiol*  
534 *Immunol* **6**, 250–255 (1991).
- 535 30. Brook, I. & Yocum, P. Immune response to *Fusobacterium nucleatum* and *Prevotella intermedia* in  
536 patients with chronic maxillary sinusitis. *Ann Otol Rhinol Laryngol* **108**, 293–295 (1999).
- 537 31. Cho, D.-Y. *et al.* Contribution of Short Chain Fatty Acids to the Growth of *Pseudomonas aeruginosa*  
538 in Rhinosinusitis. *Front. Cell. Infect. Microbiol.* **10**, 412 (2020).
- 539 32. Majerczyk, C. D. *et al.* *Staphylococcus aureus* CodY negatively regulates virulence gene  
540 expression. *J Bacteriol* **190**, 2257–2265 (2008).
- 541 33. Cho, D.-Y. *et al.* Sinus Microanatomy and Microbiota in a Rabbit Model of Rhinosinusitis. *Front Cell*  
542 *Infect Microbiol* **7**, 540 (2017).
- 543 34. Alford, M. A. *et al.* Murine Model of Sinusitis Infection for Screening Antimicrobial and  
544 Immunomodulatory Therapies. *Front Cell Infect Microbiol* **11**, 621081 (2021).
- 545 35. Park, S.-Y. *et al.* Strain-level fitness in the gut microbiome is an emergent property of glycans and a  
546 single metabolite. *Cell* **185**, 513-529.e21 (2022).
- 547 36. Brinsmade, S. R. CodY, a master integrator of metabolism and virulence in Gram-positive bacteria.  
548 *Curr Genet* **63**, 417–425 (2017).
- 549 37. Jardeleza, C. *et al.* Gene expression differences in nitric oxide and reactive oxygen species  
550 regulation point to an altered innate immune response in chronic rhinosinusitis. *Int Forum Allergy*  
551 *Rhinol* **3**, 193–198 (2013).
- 552 38. Hirschberg, A. *et al.* Different activations of toll-like receptors and antimicrobial peptides in chronic  
553 rhinosinusitis with or without nasal polyposis. *Eur Arch Otorhinolaryngol* **273**, 1779–1788 (2016).
- 554
